# Supplementary material for: The Impact of Wet Fermentation on Coffee Quality Traits and Volatile Compounds Using Digital Technologies
Source: MDPI journal article supplement (doi:10.3390/fermentation9010068), 2023-01-13
Supplement: s1 [file s1]

**Table S1.** The content of volatile compounds identified in unfermented (UFC) and fermented (FC) coffee brew with four grinding size coffee beans by HS-SPME-GC-MS

| No.                                     | Compound Name            | Molecular formula                             | RT (min) | LRI  | LRI (NIST) | Conc. (ng/mL) |       |      |       |       |              |       |      |      |      |
|-----------------------------------------|--------------------------|-----------------------------------------------|----------|------|------------|---------------|-------|------|-------|-------|--------------|-------|------|------|------|
|                                         |                          |                                               |          |      |            | UFC1          | UFC2  | UFC3 | UFC4  | UFC5  | FC1          | FC2   | FC3  | FC4  | FC5  |
| Size 1 (250 μm)                         |                          |                                               |          |      |            |               |       |      |       |       |              |       |      |      |      |
| Pyridines                               |                          |                                               |          |      |            |               |       |      |       |       |              |       |      |      |      |
| 1                                       | Pyridine                 | C <sub>5</sub> H <sub>5</sub> N               | 10.49    | 1170 | 1169       | 0.36          | 0.72  | 0.48 | 0.99  | 0.78  | 0.48         | 0.61  | 0.38 | 0.72 | 0.29 |
| Pyrazines                               |                          |                                               |          |      |            |               |       |      |       |       |              |       |      |      |      |
| 2                                       | 2-Methylpyrazine         | C <sub>5</sub> H <sub>6</sub> N <sub>2</sub>  | 13.01    | 1250 | 1252       | 1.98          | 1.43  | 1.59 | 1.64  | 2.15  | 2.40         | 2.24  | 2.21 | 2.05 | 1.61 |
| 3                                       | 2,5-Dimethylpyrazine     | C <sub>5</sub> H <sub>6</sub> N <sub>2</sub>  | 14.73    | 1305 | 1316       | 0.79          | 0.65  | 0.66 | 0.84  | 1.06  | 1.01         | 0.97  | 0.93 | 0.99 | 0.67 |
| 4                                       | 2,6-Dimethylpyrazine     | C <sub>6</sub> H <sub>8</sub> N <sub>2</sub>  | 14.92    | 1311 | 1314       | 1.12          | 0.96  | 1.05 | 1.16  | 1.44  | 1.50         | 1.46  | 1.38 | 1.38 | 1.07 |
| 5                                       | 2-Ethylpyrazine          | C <sub>6</sub> H <sub>8</sub> N <sub>2</sub>  | 15.05    | 1316 | 1325       | 0.83          | 0.67  | 0.67 | 0.84  | 0.93  | 0.93         | 1.00  | 0.91 | 0.91 | 0.70 |
| 6                                       | 2-Ethyl-6-methylpyrazine | C <sub>7</sub> H <sub>10</sub> N <sub>2</sub> | 16.55    | 1368 | 1375       | 0.93          | 0.84  | 0.77 | 1.10  | 1.43  | 1.09         | 1.28  | 1.08 | 1.26 | 0.89 |
| 7                                       | 2-Ethyl-5-methylpyrazine | C <sub>7</sub> H <sub>10</sub> N <sub>2</sub> | 16.72    | 1374 | 1380       | 0.90          | 0.73  | 0.67 | 1.03  | 1.22  | 1.06         | 1.07  | 0.99 | 1.13 | 0.83 |
| Acids                                   |                          |                                               |          |      |            |               |       |      |       |       |              |       |      |      |      |
| 8                                       | Acetic acid              | C <sub>2</sub> H <sub>4</sub> O <sub>2</sub>  | 18.34    | 1432 | 1432       | 0.98          | 0.83  | 0.77 | 0.88  | 0.89  | 0.75         | 0.84  | 0.75 | 0.76 | 0.78 |
| Furan and Furanic compounds             |                          |                                               |          |      |            |               |       |      |       |       |              |       |      |      |      |
| 9                                       | Furfural                 | C <sub>5</sub> H <sub>4</sub> O <sub>2</sub>  | 18.54    | 1440 | 1443       | 6.09          | 10.53 | 8.02 | 10.26 | 12.03 | 7.67         | 10.32 | 7.29 | 9.29 | 5.89 |
| 10                                      | 2-Furanmethanol          | C <sub>5</sub> H <sub>6</sub> O <sub>2</sub>  | 23.62    | 1646 | 1658       | 2.99          | 3.69  | 3.37 | 3.46  | 4.10  | 3.15         | 3.64  | 3.14 | 3.84 | 2.65 |
| 11                                      | 5-Methylfurfural         | C <sub>6</sub> H <sub>6</sub> O <sub>2</sub>  | 21.37    | 1551 | 1555       | 3.72          | 7.10  | 5.07 | 6.52  | 8.03  | 4.07         | 7.36  | 3.94 | 6.49 | 4.07 |
| 12                                      | Furfuryl acetate         | C <sub>7</sub> H <sub>8</sub> O <sub>3</sub>  | 20.52    | 1516 | 1523       | 2.00          | 3.12  | 1.93 | 2.84  | 3.16  | 1.49         | 5.00  | 1.67 | 2.99 | 2.22 |
| Ketones                                 |                          |                                               |          |      |            |               |       |      |       |       |              |       |      |      |      |
| 13                                      | 2-Acetylfuran            | C <sub>6</sub> H <sub>6</sub> O <sub>2</sub>  | 19.64    | 1481 | 1484       | 1.47          | 2.47  | 2.06 | 2.09  | 2.26  | 1.57         | 2.30  | 1.57 | 2.05 | 1.45 |
| Phenols                                 |                          |                                               |          |      |            |               |       |      |       |       |              |       |      |      |      |
| 14                                      | 2-Methoxy-4-vinylphenol  | C <sub>9</sub> H <sub>10</sub> O <sub>2</sub> | 34.77    | 2168 | 2172       | 0.34          | 0.36  | 0.40 | 0.35  | 0.36  | 0.40         | 0.36  | 0.40 | 0.35 | 0.37 |
| Average content of overall detected VOC |                          |                                               |          |      |            | 30.73 ± 0.02  |       |      |       |       | 29.14 ± 0.01 |       |      |      |      |

Table S1 (Continued)

| Size 2 (350 µm)                         |                          |                                               |       |      |      |      |       |              |       |       |      |              |      |      |      |
|-----------------------------------------|--------------------------|-----------------------------------------------|-------|------|------|------|-------|--------------|-------|-------|------|--------------|------|------|------|
| Pyridines                               |                          |                                               |       |      |      |      |       |              |       |       |      |              |      |      |      |
| 1                                       | Pyridine                 | C <sub>5</sub> H <sub>5</sub> N               | 10.49 | 1170 | 1169 | 0.42 | 0.83  | 0.65         | 0.84  | 1.00  | 0.49 | 0.47         | 0.34 | 0.57 | 0.32 |
| Pyrazines                               |                          |                                               |       |      |      |      |       |              |       |       |      |              |      |      |      |
| 2                                       | 2-Methylpyrazine         | C <sub>5</sub> H <sub>6</sub> N <sub>2</sub>  | 13.01 | 1250 | 1252 | 1.90 | 1.17  | 1.75         | 1.87  | 2.04  | 2.63 | 1.85         | 2.37 | 1.61 | 1.71 |
| 3                                       | 2,5-Dimethylpyrazine     | C <sub>5</sub> H <sub>6</sub> N <sub>2</sub>  | 14.74 | 1305 | 1316 | 0.67 | 0.48  | 0.74         | 0.97  | 0.89  | 1.17 | 0.70         | 0.97 | 0.65 | 0.59 |
| 4                                       | 2,6-Dimethylpyrazine     | C <sub>6</sub> H <sub>8</sub> N <sub>2</sub>  | 14.92 | 1311 | 1314 | 1.02 | 0.74  | 1.15         | 1.27  | 1.32  | 1.61 | 1.13         | 1.44 | 1.06 | 1.09 |
| 5                                       | 2-Ethylpyrazine          | C <sub>6</sub> H <sub>8</sub> N <sub>2</sub>  | 15.05 | 1316 | 1325 | 0.71 | 0.47  | 0.73         | 0.89  | 0.87  | 1.06 | 0.77         | 0.93 | 0.72 | 0.63 |
| 6                                       | 2-Ethyl-6-methylpyrazine | C <sub>7</sub> H <sub>10</sub> N <sub>2</sub> | 16.56 | 1368 | 1375 | 0.77 | 0.60  | 0.91         | 1.21  | 1.20  | 1.30 | 0.99         | 1.04 | 0.92 | 0.88 |
| 7                                       | 2-Ethyl-5-methylpyrazine | C <sub>7</sub> H <sub>10</sub> N <sub>2</sub> | 16.73 | 1374 | 1380 | 0.68 | 0.49  | 0.82         | 1.09  | 1.04  | 1.19 | 0.78         | 1.04 | 0.78 | 0.72 |
| Acids                                   |                          |                                               |       |      |      |      |       |              |       |       |      |              |      |      |      |
| 8                                       | Acetic acid              | C <sub>2</sub> H <sub>4</sub> O <sub>2</sub>  | 18.34 | 1432 | 1432 | 0.80 | 0.64  | 0.65         | 0.78  | 0.55  | 0.70 | 0.72         | 0.57 | 0.68 | 0.46 |
| Furan and Furanic compounds             |                          |                                               |       |      |      |      |       |              |       |       |      |              |      |      |      |
| 9                                       | Furfural                 | C <sub>5</sub> H <sub>4</sub> O <sub>2</sub>  | 18.54 | 1440 | 1443 | 5.71 | 10.32 | 8.75         | 13.08 | 11.34 | 8.66 | 9.05         | 6.56 | 7.55 | 5.65 |
| 10                                      | 2-Furanmethanol          | C <sub>5</sub> H <sub>6</sub> O <sub>2</sub>  | 23.62 | 1646 | 1658 | 2.83 | 3.39  | 3.40         | 4.29  | 3.72  | 3.46 | 4.14         | 2.97 | 2.83 | 2.83 |
| 11                                      | 5-Methylfurfural         | C <sub>6</sub> H <sub>6</sub> O <sub>2</sub>  | 21.37 | 1551 | 1555 | 3.10 | 6.38  | 5.61         | 8.71  | 7.04  | 4.70 | 6.17         | 3.15 | 4.68 | 3.75 |
| 12                                      | Furfuryl acetate         | C <sub>7</sub> H <sub>8</sub> O <sub>3</sub>  | 20.52 | 1516 | 1523 | 1.48 | 2.64  | 2.20         | 3.30  | 2.85  | 2.04 | 4.76         | 1.34 | 2.28 | 2.15 |
| Ketones                                 |                          |                                               |       |      |      |      |       |              |       |       |      |              |      |      |      |
| 13                                      | 2-Acetylfuran            | C <sub>6</sub> H <sub>6</sub> O <sub>2</sub>  | 19.64 | 1481 | 1484 | 1.33 | 2.36  | 2.10         | 2.67  | 2.00  | 1.86 | 1.97         | 1.41 | 1.54 | 1.43 |
| Phenols                                 |                          |                                               |       |      |      |      |       |              |       |       |      |              |      |      |      |
| 14                                      | 2-Methoxy-4-vinylphenol  | C <sub>9</sub> H <sub>10</sub> O <sub>2</sub> | 34.77 | 2168 | 2172 | 0.33 | 0.35  | 0.35         | 0.43  | 0.34  | 0.53 | 0.42         | 0.44 | 0.42 | 0.39 |
| Average content of overall detected VOC |                          |                                               |       |      |      |      |       | 32.05 ± 0.04 |       |       |      | 27.76 ± 0.04 |      |      |      |

Table S1 (Continued)

| Size 3 (550 µm)                         |                          |                                               |       |      |      |      |      |              |       |       |      |              |      |      |      |
|-----------------------------------------|--------------------------|-----------------------------------------------|-------|------|------|------|------|--------------|-------|-------|------|--------------|------|------|------|
| Pyridines                               |                          |                                               |       |      |      |      |      |              |       |       |      |              |      |      |      |
| 1                                       | Pyridine                 | C <sub>5</sub> H <sub>5</sub> N               | 10.49 | 1170 | 1169 | 0.46 | 0.68 | 0.53         | 0.94  | 0.85  | 0.39 | 0.48         | 0.42 | 0.58 | 0.34 |
| Pyrazines                               |                          |                                               |       |      |      |      |      |              |       |       |      |              |      |      |      |
| 2                                       | 2-Methylpyrazine         | C <sub>5</sub> H <sub>6</sub> N <sub>2</sub>  | 13.01 | 1250 | 1252 | 2.03 | 1.03 | 1.71         | 1.81  | 2.01  | 2.32 | 1.64         | 2.22 | 1.48 | 1.87 |
| 3                                       | 2,5-Dimethylpyrazine     | C <sub>5</sub> H <sub>6</sub> N <sub>2</sub>  | 14.73 | 1305 | 1316 | 0.74 | 0.37 | 0.65         | 0.86  | 0.95  | 0.88 | 0.54         | 0.88 | 0.52 | 0.67 |
| 4                                       | 2,6-Dimethylpyrazine     | C <sub>6</sub> H <sub>8</sub> N <sub>2</sub>  | 14.91 | 1311 | 1314 | 1.17 | 0.61 | 0.98         | 1.23  | 1.30  | 1.33 | 0.96         | 1.32 | 0.87 | 1.14 |
| 5                                       | 2-Ethylpyrazine          | C <sub>6</sub> H <sub>8</sub> N <sub>2</sub>  | 15.04 | 1316 | 1325 | 0.73 | 0.43 | 0.63         | 0.85  | 0.85  | 0.79 | 0.67         | 0.85 | 0.57 | 0.87 |
| 6                                       | 2-Ethyl-6-methylpyrazine | C <sub>7</sub> H <sub>10</sub> N <sub>2</sub> | 16.55 | 1368 | 1375 | 0.82 | 0.46 | 0.71         | 1.03  | 1.22  | 0.90 | 0.74         | 0.89 | 0.72 | 0.94 |
| 7                                       | 2-Ethyl-5-methylpyrazine | C <sub>7</sub> H <sub>10</sub> N <sub>2</sub> | 16.72 | 1374 | 1380 | 0.78 | 0.42 | 0.62         | 1.03  | 1.08  | 0.86 | 0.60         | 0.89 | 0.62 | 0.81 |
| Acids                                   |                          |                                               |       |      |      |      |      |              |       |       |      |              |      |      |      |
| 8                                       | Acetic acid              | C <sub>2</sub> H <sub>4</sub> O <sub>2</sub>  | 18.33 | 1432 | 1432 | 0.85 | 0.43 | 0.77         | 0.59  | 0.81  | 0.73 | 0.37         | 0.70 | 0.67 | 0.83 |
| Furan and Furanic compounds             |                          |                                               |       |      |      |      |      |              |       |       |      |              |      |      |      |
| 9                                       | Furfural                 | C <sub>5</sub> H <sub>4</sub> O <sub>2</sub>  | 18.54 | 1440 | 1443 | 5.65 | 9.10 | 7.59         | 10.46 | 10.88 | 8.25 | 7.91         | 7.11 | 6.99 | 5.68 |
| 10                                      | 2-Furanmethanol          | C <sub>5</sub> H <sub>6</sub> O <sub>2</sub>  | 23.61 | 1646 | 1658 | 2.91 | 2.72 | 3.48         | 3.36  | 3.65  | 3.20 | 3.40         | 2.98 | 2.64 | 2.51 |
| 11                                      | 5-Methylfurfural         | C <sub>6</sub> H <sub>6</sub> O <sub>2</sub>  | 21.37 | 1551 | 1555 | 3.20 | 5.04 | 4.71         | 6.33  | 6.86  | 3.87 | 4.89         | 3.22 | 4.08 | 3.63 |
| 12                                      | Furfuryl acetate         | C <sub>7</sub> H <sub>8</sub> O <sub>3</sub>  | 20.51 | 1516 | 1523 | 1.83 | 2.31 | 1.79         | 2.76  | 2.94  | 1.60 | 4.04         | 1.22 | 2.01 | 2.20 |
| Ketones                                 |                          |                                               |       |      |      |      |      |              |       |       |      |              |      |      |      |
| 13                                      | 2-Acetylfuran            | C <sub>6</sub> H <sub>6</sub> O <sub>2</sub>  | 19.63 | 1481 | 1484 | 1.41 | 2.05 | 1.97         | 2.12  | 2.12  | 1.61 | 1.80         | 1.54 | 1.42 | 1.45 |
| Phenols                                 |                          |                                               |       |      |      |      |      |              |       |       |      |              |      |      |      |
| 14                                      | 2-Methoxy-4-vinylphenol  | C <sub>9</sub> H <sub>10</sub> O <sub>2</sub> | 34.76 | 2168 | 2172 | 0.37 | 0.25 | 0.43         | 0.35  | 0.39  | 0.46 | 0.37         | 0.39 | 0.37 | 0.40 |
| Average content of overall detected VOC |                          |                                               |       |      |      |      |      | 29.01 ± 0.03 |       |       |      | 25.42 ± 0.01 |      |      |      |

Table S1 (Continued)

| Size 4 (750 µm)                         |                          |                                               |        |      |      |      |      |              |      |      |      |              |      |      |      |
|-----------------------------------------|--------------------------|-----------------------------------------------|--------|------|------|------|------|--------------|------|------|------|--------------|------|------|------|
| <b>Pyridines</b>                        |                          |                                               |        |      |      |      |      |              |      |      |      |              |      |      |      |
| 1                                       | Pyridine                 | C <sub>5</sub> H <sub>5</sub> N               | 10.48  | 1170 | 1169 | 0.35 | 0.74 | 0.45         | 0.66 | 0.53 | 0.37 | 0.47         | 0.35 | 0.66 | 0.36 |
| <b>Pyrazines</b>                        |                          |                                               |        |      |      |      |      |              |      |      |      |              |      |      |      |
| 2                                       | 2-Methylpyrazine         | C <sub>5</sub> H <sub>6</sub> N <sub>2</sub>  | 13.00  | 1250 | 1252 | 1.98 | 1.09 | 1.32         | 1.20 | 1.18 | 2.21 | 1.59         | 1.63 | 1.46 | 1.66 |
| 3                                       | 2,5-Dimethylpyrazine     | C <sub>5</sub> H <sub>6</sub> N <sub>2</sub>  | 14.72  | 1305 | 1316 | 0.91 | 0.42 | 0.41         | 0.50 | 0.47 | 0.79 | 0.53         | 0.55 | 0.54 | 0.64 |
| 4                                       | 2,6-Dimethylpyrazine     | C <sub>6</sub> H <sub>8</sub> N <sub>2</sub>  | 14.90  | 1311 | 1314 | 1.25 | 0.64 | 0.66         | 0.77 | 0.70 | 1.19 | 0.93         | 0.83 | 0.88 | 1.05 |
| 5                                       | 2-Ethylpyrazine          | C <sub>6</sub> H <sub>8</sub> N <sub>2</sub>  | 15.03  | 1316 | 1325 | 0.74 | 0.44 | 0.54         | 0.56 | 0.55 | 0.82 | 0.61         | 0.58 | 0.59 | 0.70 |
| 6                                       | 2-Ethyl-6-methylpyrazine | C <sub>7</sub> H <sub>10</sub> N <sub>2</sub> | 16.54  | 1368 | 1375 | 1.06 | 0.49 | 0.47         | 0.61 | 0.59 | 0.78 | 0.71         | 0.59 | 0.69 | 0.84 |
| 7                                       | 2-Ethyl-5-methylpyrazine | C <sub>7</sub> H <sub>10</sub> N <sub>2</sub> | 16.71  | 1374 | 1380 | 0.96 | 0.47 | 0.43         | 0.58 | 0.58 | 0.75 | 0.58         | 0.59 | 0.64 | 0.74 |
| <b>Acids</b>                            |                          |                                               |        |      |      |      |      |              |      |      |      |              |      |      |      |
| 8                                       | Acetic acid              | C <sub>2</sub> H <sub>4</sub> O <sub>2</sub>  | 18.33  | 1432 | 1432 | 0.89 | 0.58 | 0.52         | 0.52 | 0.46 | 0.70 | 0.47         | 0.46 | 0.60 | 0.39 |
| <b>Furan and Furanic compounds</b>      |                          |                                               |        |      |      |      |      |              |      |      |      |              |      |      |      |
| 9                                       | Furfural                 | C <sub>5</sub> H <sub>4</sub> O <sub>2</sub>  | 18.53  | 1440 | 1443 | 7.13 | 9.86 | 5.83         | 8.99 | 7.24 | 7.63 | 7.93         | 5.09 | 6.79 | 5.65 |
| 10                                      | 2-Furanmethanol          | C <sub>5</sub> H <sub>6</sub> O <sub>2</sub>  | 23.60  | 1646 | 1658 | 2.74 | 3.14 | 2.48         | 2.71 | 2.62 | 3.01 | 3.55         | 2.18 | 2.93 | 2.52 |
| 11                                      | 5-Methylfurfural         | C <sub>6</sub> H <sub>6</sub> O <sub>2</sub>  | 21.365 | 1551 | 1555 | 5.08 | 5.75 | 3.04         | 4.88 | 3.96 | 3.43 | 4.84         | 2.17 | 3.92 | 3.72 |
| 12                                      | Furfuryl acetate         | C <sub>7</sub> H <sub>8</sub> O <sub>3</sub>  | 20.51  | 1516 | 1523 | 1.97 | 2.35 | 1.30         | 2.21 | 1.93 | 1.61 | 3.82         | 0.87 | 2.04 | 1.88 |
| <b>Ketones</b>                          |                          |                                               |        |      |      |      |      |              |      |      |      |              |      |      |      |
| 13                                      | 2-Acetylfuran            | C <sub>6</sub> H <sub>6</sub> O <sub>2</sub>  | 19.63  | 1481 | 1484 | 1.52 | 2.19 | 1.44         | 1.73 | 1.15 | 1.47 | 1.63         | 0.91 | 1.33 | 1.41 |
| <b>Phenols</b>                          |                          |                                               |        |      |      |      |      |              |      |      |      |              |      |      |      |
| 14                                      | 2-Methoxy-4-vinylphenol  | C <sub>9</sub> H <sub>10</sub> O <sub>2</sub> | 34.75  | 2168 | 2172 | 0.78 | 0.36 | 0.33         | 0.31 | 0.36 | 0.45 | 0.47         | 0.08 | 0.40 | 0.38 |
| Average content of overall detected VOC |                          |                                               |        |      |      |      |      | 24.73 ± 0.02 |      |      |      | 23.13 ± 0.03 |      |      |      |

RT is short for retention time. LRI is short for linear retention index. All values represented the average of three replicates from unfermented (UFC) and fermented coffee samples (FC) with five different brands.
